# Supplementary material
Source: publisher figshare collection journal article supplement (https://sage.figshare.com/ndownloader/files/16214534)
Supplement: Supplementary file 1 [file 16214534]

**Supplementary Table 1** Cortical excitability assessments from Day 0 to Day 90

| <b>Adjusted Means</b>                          |                                               |                            |                        |                            |                    |                             |                             |                             |
|------------------------------------------------|-----------------------------------------------|----------------------------|------------------------|----------------------------|--------------------|-----------------------------|-----------------------------|-----------------------------|
|                                                | <b>Combined<br/>(Fluoxetine+rTMS)<br/>N=9</b> | <b>Fluoxetine<br/>N=10</b> | <b>Placebo<br/>N=8</b> | <b>p value</b>             | <b>F value</b>     | <b>p value, C<br/>vs. F</b> | <b>p value, C<br/>vs. P</b> | <b>p value, F<br/>vs. P</b> |
| <b>MEP</b>                                     | -0.06 (-0.5; 0.39)                            | -0.021 (-0.44;0.40)        | 0.49 (0.10; 0.96)      | 0.0513                     | F(3, 23)<br>=3.00  | 0.499                       | <b>0.018</b>                | 0.044                       |
| <b>ICI</b>                                     | 0.85 (0.30; 1.40)                             | 0.14 (-0.38; 0.66)         | -0.13(-0.71; 0.46)     | 0.1025                     | F(3, 23) =<br>2.32 | 0.081                       | <b>0.036</b>                | 0.512                       |
| <b>ICF</b>                                     | 0.56 (-0.20; 1.30)                            | 0.83 (0.12; 1.54)          | -0.25 (-1.05; 0.54)    | 0.2047                     | F(3, 23)=<br>1.65  | 0.508                       | 0.257                       | 0.065                       |
| <b>Per protocol analysis (completers only)</b> |                                               |                            |                        |                            |                    |                             |                             |                             |
|                                                | <b>Combined<br/>(Fluoxetine+rTMS)<br/>N=8</b> | <b>Fluoxetine<br/>N=6</b>  | <b>Placebo<br/>N=5</b> | <b><math>\chi^2</math></b> | <b>df</b>          | <b>p value, C<br/>vs. F</b> | <b>p value, C<br/>vs. P</b> | <b>p value, F<br/>vs. P</b> |
| <b>ICI</b>                                     | 0.35 (0.20, 0.67)                             | 0.03 (-0.03, 0.28)         | -0.09 (-0.12, 0.03)    | 8.48                       | 2                  | 0.068                       | <b>0.002</b>                | 0.082                       |
| <b>ICF</b>                                     | -0.16 (-0.50, 0.87)                           | 0.96 (0.5, 1.5)            | -0.30 (-0.71, 0.18)    | 5.11                       | 2                  | <b>0.037</b>                | 0.293                       | <b>0.018</b>                |

All data described are changes from Day 0 to Day 90. For the adjusted analysis table, medians were adjusted for time-since-stroke (categorized to <180 days or >180 days) with a linear regression model, multiple imputation was performed for missing data. Median changes and confidence interval are reported. For the per protocol analysis, results of unadjusted analysis without multiple imputation for missing data. Median changes and interquartile range (IQR 25 and 75 %) are reported. MEP= motor evoked potential; ICF = intracortical facilitation; ICI = intracortical inhibition; C vs. F = Combined vs. Fluoxetine; C vs. P = Combined vs. Placebo; F vs. P = Fluoxetine vs. Placebo; Bold are to indicate significance with p <0.05

**Supplementary Table 2.** Secondary assessments - changes from Day 0 to Day 90

|             |                     | <b>Combined</b><br><b>(Fluoxetine+rTMS)</b><br>(n=9) | <b>Fluoxetine</b><br>(n=10) | <b>Placebo</b><br>(n=8) | $\chi^2$ | <i>p</i> value |
|-------------|---------------------|------------------------------------------------------|-----------------------------|-------------------------|----------|----------------|
| <b>BDI</b>  | Median<br>(min-max) | -1 (-11 – 9)                                         | -0.5 (-10 – 1)              | -2 (-6 – 2)             | 0.053    | 0.974          |
| <b>MMSE</b> | Mean (SD)           | 0.33 (2.18)                                          | 0.71 (1.11)                 | 0.17 (0.41)             |          | 0.399          |
| <b>MAS</b>  | Median<br>(min-max) | 0.5 (-2 – 3)                                         | 1 (-2.5 – 3)                | 0.25 (-5 – 1)           | 0.971    | 0.615          |

All data described are changes from Day 0 to Day 90. Kruskal-Wallis Test was applied for BDI and MAS; one-way ANOVA was applied for MMSE. BDI = Beck's Depression Inventory; MAS = Modified Ashworth Scale; MMSE = Mini-Mental State Examination.

**Supplementary Table 3.** rTMS-related adverse events

|                              | <b>Combined<br/>(Fluoxetine + rTMS)</b><br>N=186 | <b>Fluoxetine</b><br>N=178 | <b>Placebo</b><br>N=114 | <i>p value</i> |
|------------------------------|--------------------------------------------------|----------------------------|-------------------------|----------------|
| Headache, N (%)              | 4 (2%)                                           | 0 (0%)                     | 9 (8%)                  | 0.221          |
| Neck pain, N (%)             | 14 (8%)                                          | 4 (2%)                     | 4 (4%)                  | 0.505          |
| Skin redness, N (%)          | 0 (0%)                                           | 4 (2%)                     | 1 (1%)                  | 0.523          |
| Sleepiness, N (%)            | 13 (7%)                                          | 12 (7%)                    | 21 (18%)                | 0.184          |
| Trouble concentrating, N (%) | 0 (0%)                                           | 1 (1%)                     | 0 (0%)                  | 1.000          |
| Acute mood changes, N (%)    | 0 (0%)                                           | 0 (0%)                     | 1 (1%)                  | 0.296          |

N = number of TMS-related adverse events; (%) = incidence of event (N/total visits).

**Supplementary Table 4.** Fluoxetine-related adverse events

|                                   | <b>Combined<br/>(Fluoxetine + rTMS)<br/>N=179</b> | <b>Fluoxetine<br/>N=169</b> | <b>Placebo<br/>N=109</b> | <i>p value</i> |
|-----------------------------------|---------------------------------------------------|-----------------------------|--------------------------|----------------|
| Dry Mouth, N (%)                  | 4 (2.2%)                                          | 0 (0%)                      | 3 (2.7%)                 | 0.328          |
| Drowsiness, N (%)                 | 4 (2.2%)                                          | 0 (0%)                      | 16 (14.6%)               | 0.093          |
| Insomnia, N (%)                   | 6 (3.3%)                                          | 4 (2.3%)                    | 8 (7.3%)                 | 0.071          |
| Blurred vision, N (%)             | 0 (0%)                                            | 2 (1.2%)                    | 4 (3.7%)                 | 0.273          |
| Headache, N (%)                   | 2 (1.1%)                                          | 0 (0%)                      | 3 (2.7%)                 | 0.119          |
| Constipation, N (%)               | 2 (1.1%)                                          | 1 (0.6%)                    | 5 (4.6%)                 | 0.230          |
| Diarrhea, N (%)                   | 0 (0%)                                            | 1 (0.6%)                    | 4 (3.7%)                 | 0.134          |
| Decreased appetite, N (%)         | 1 (0.6%)                                          | 1 (0.6%)                    | 6 (5.5%)                 | 0.055          |
| Increased body temperature, N (%) | 1 (0.6%)                                          | 4 (2.3%)                    | 0 (0%)                   | 0.754          |
| Tremor, N (%)                     | 2 (1.1%)                                          | 3 (1.8%)                    | 1 (0.9%)                 | 1.000          |
| Yawning, N (%)                    | 4 (2.2%)                                          | 2 (1.2%)                    | 18 (16.5%)               | 0.572          |
| Weight gain, N (%)                | 1 (0.6%)                                          | 2 (1.2%)                    | 4 (3.7%)                 | 0.403          |

N = number of fluoxetine-related adverse events; (%) = incidence of event (N/total visits).
